# Supplementary material for: Selective electrooxidation of 5-hydroxymethylfurfural to 5-formyl-furan-2-formic acid on non-metallic polyaniline catalysts: structure–function relationships
Source: Royal Society of Chemistry journal article supplement (doi:10.1039/d4sc01752h), 2024-01-01
Supplement: d4sc01752h1.pdf [file d4sc01752h1.pdf]

## Supporting Information

### Selective electrooxidation of 5-hydroxymethylfurfural to 5-formyl-furan-2-formic acid on non-metallic polyaniline catalysts: Structure-function relationships

Xingyu Lu<sup>a,b</sup>, Ke Qi<sup>a,b</sup>, Xueya Dai<sup>a,b</sup>, Yunlong Li<sup>a,b</sup>, Di Wang<sup>c</sup>, Jing Dou<sup>a,b</sup>, Wei Qi<sup>a,b\*</sup>

<sup>a</sup> Shenyang National Laboratory for Materials Science Institute of Metal Research, Chinese Academy of Sciences Shenyang, Liaoning, China

<sup>b</sup> School of Materials Science and Engineering University of Science and Technology of China Shenyang, Liaoning, China

<sup>c</sup> School of Pharmacy, Shenyang Pharmaceutical University, No.26 Huatuo Rd, High & New Tech Development Zone, Benxi, Liaoning Province, China.

\*Email: wqi@imr.ac.cn

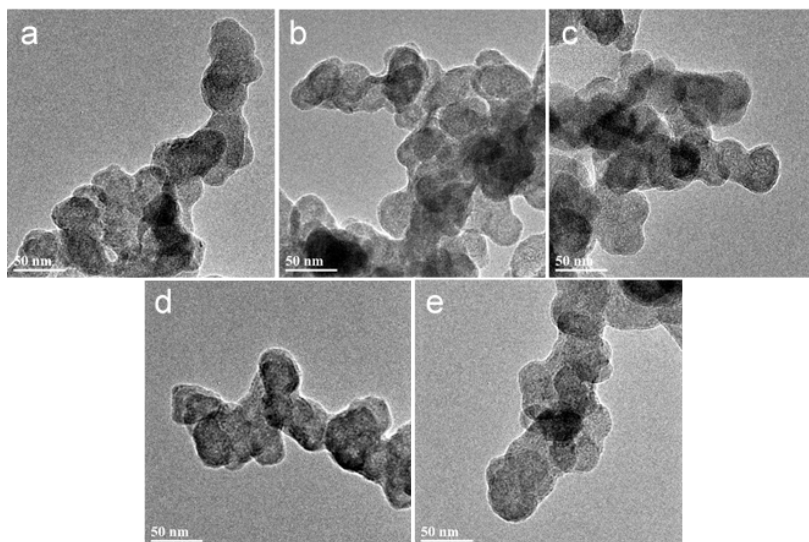

**Fig. S1.** TEM images of (a) PANI<sub>2</sub>/CP, (b) PANI<sub>3</sub>/CP, (c) PANI<sub>4</sub>/CP, (d) PANI<sub>5</sub>/CP and (e) PANI<sub>6</sub>/CP catalysts.

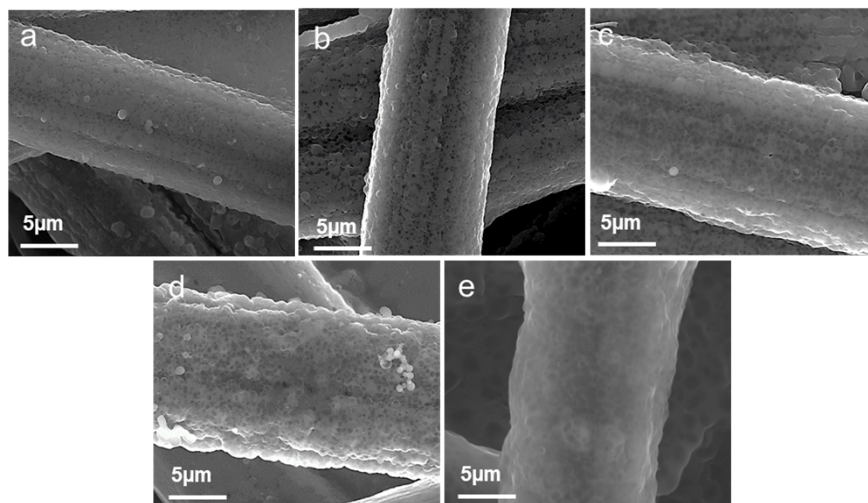

**Fig. S2.** SEM images of (a) PANI<sub>2</sub>/CP, (b) PANI<sub>3</sub>/CP, (c) PANI<sub>4</sub>/CP, (d) PANI<sub>5</sub>/CP and (e) PANI<sub>6</sub>/CP catalysts.

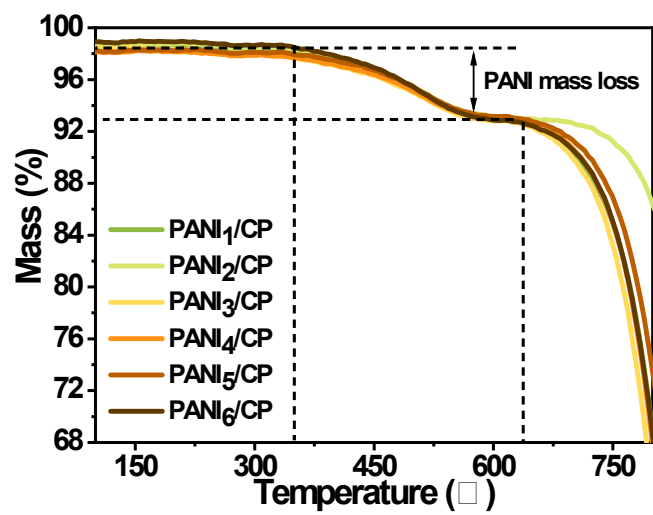

Fig. S3. TGA profiles of all PANI/CP catalysts in air.

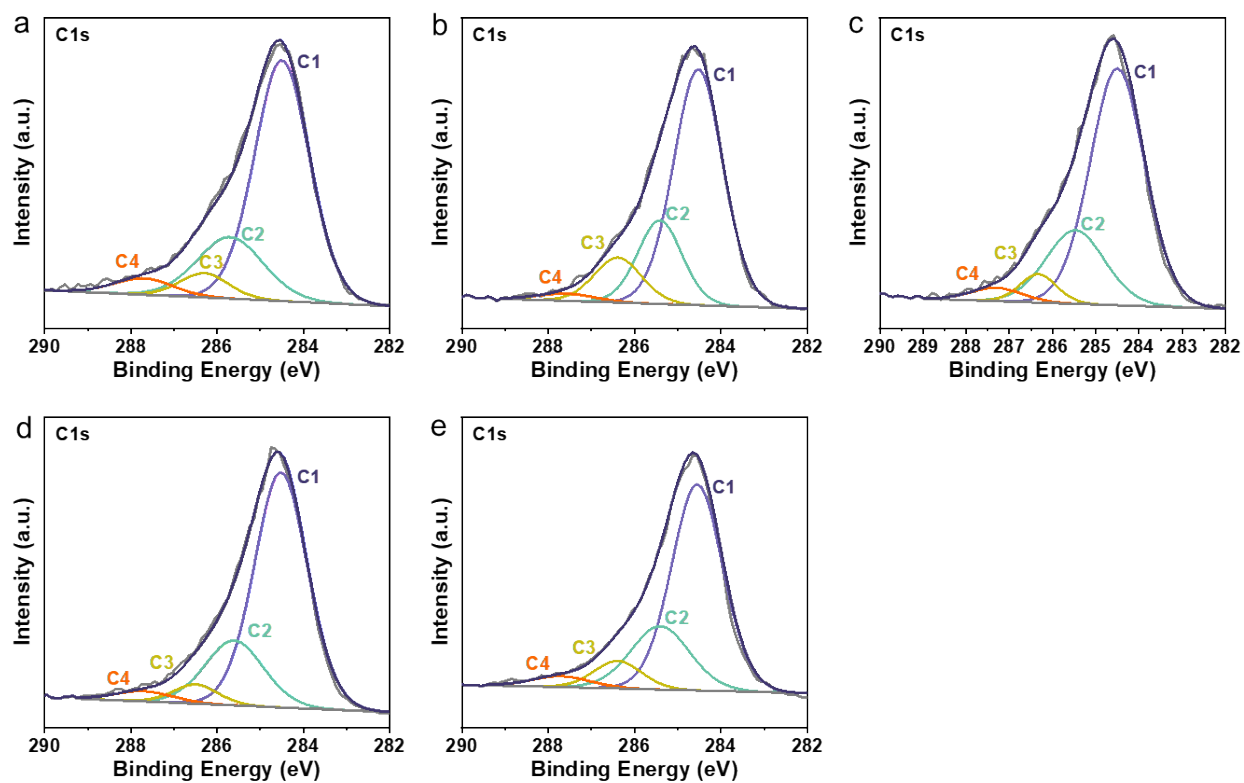

**Fig. S4.** Deconvoluted C 1s XPS spectra of a) PANI<sub>2</sub>/CP, b) PANI<sub>3</sub>/CP, c) PANI<sub>4</sub>/CP, d) PANI<sub>5</sub>/CP and e) PANI<sub>6</sub>/CP catalysts.

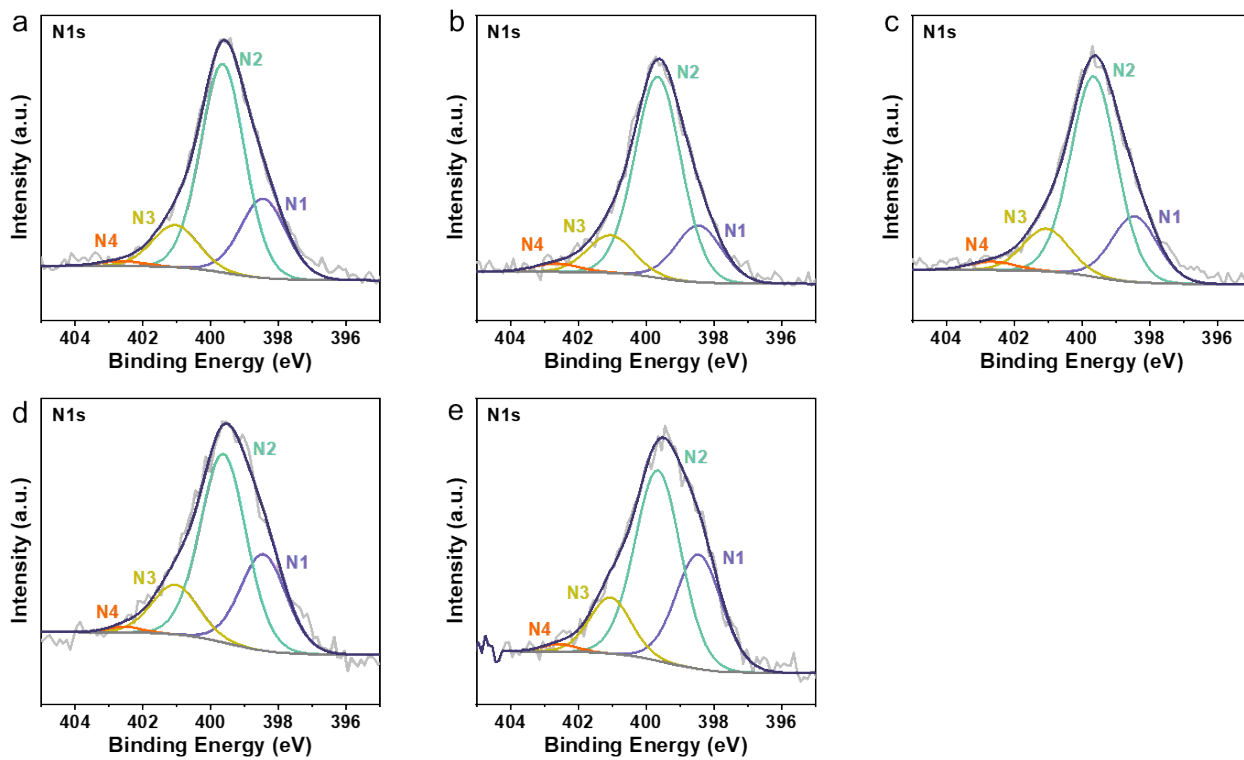

**Fig. S5.** Deconvoluted N1s XPS spectra of a) PANI<sub>2</sub>/CP, b) PANI<sub>3</sub>/CP, c) PANI<sub>4</sub>/CP, d) PANI<sub>5</sub>/CP and e) PANI<sub>6</sub>/CP catalysts.

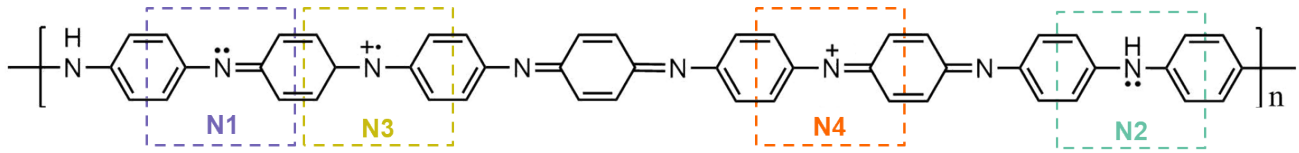

**Fig. S6.** Chemical structure diagram of polyaniline.

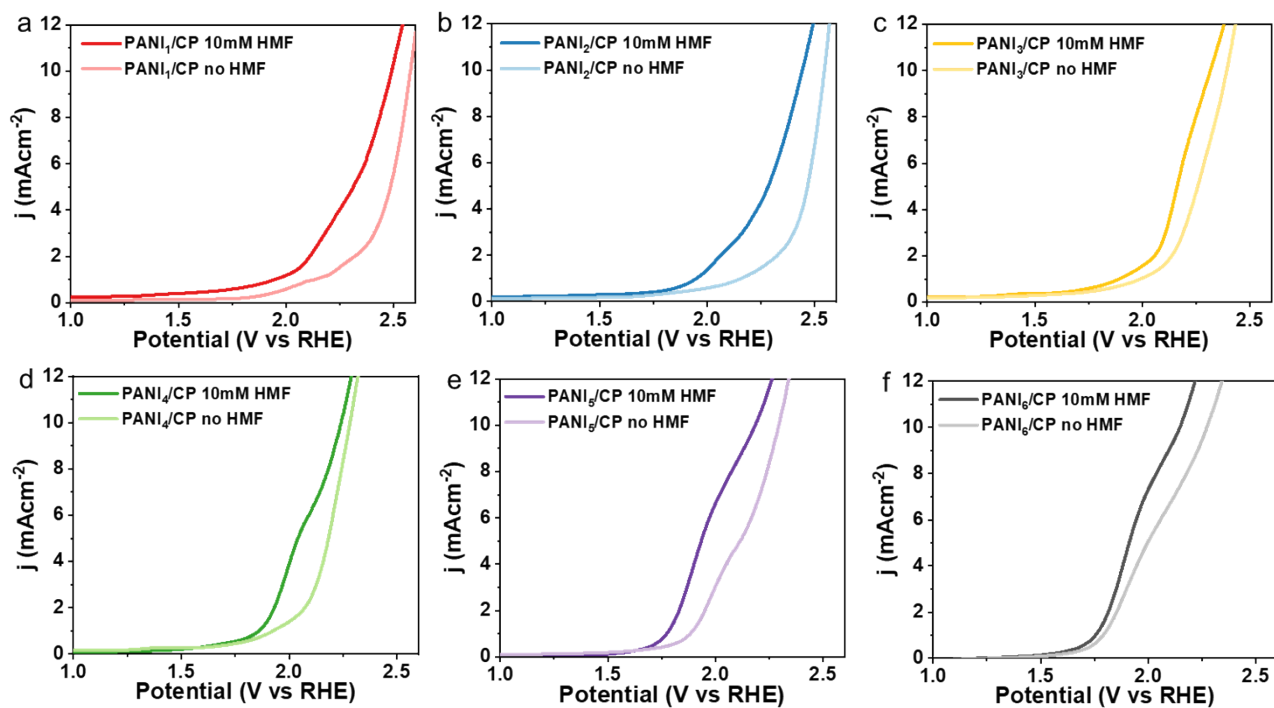

**Fig. S7.** Linear sweep voltammetry curves of a) PANI<sub>1</sub>/CP, b) PANI<sub>2</sub>/CP, c) PANI<sub>3</sub>/CP, d) PANI<sub>4</sub>/CP, e) PANI<sub>5</sub>/CP and f) PANI<sub>6</sub>/CP samples with 10 mM HMF or without HMF in 0.1 M KOH solution (pH 13) at the scan rate of 10 mV s<sup>-1</sup>.



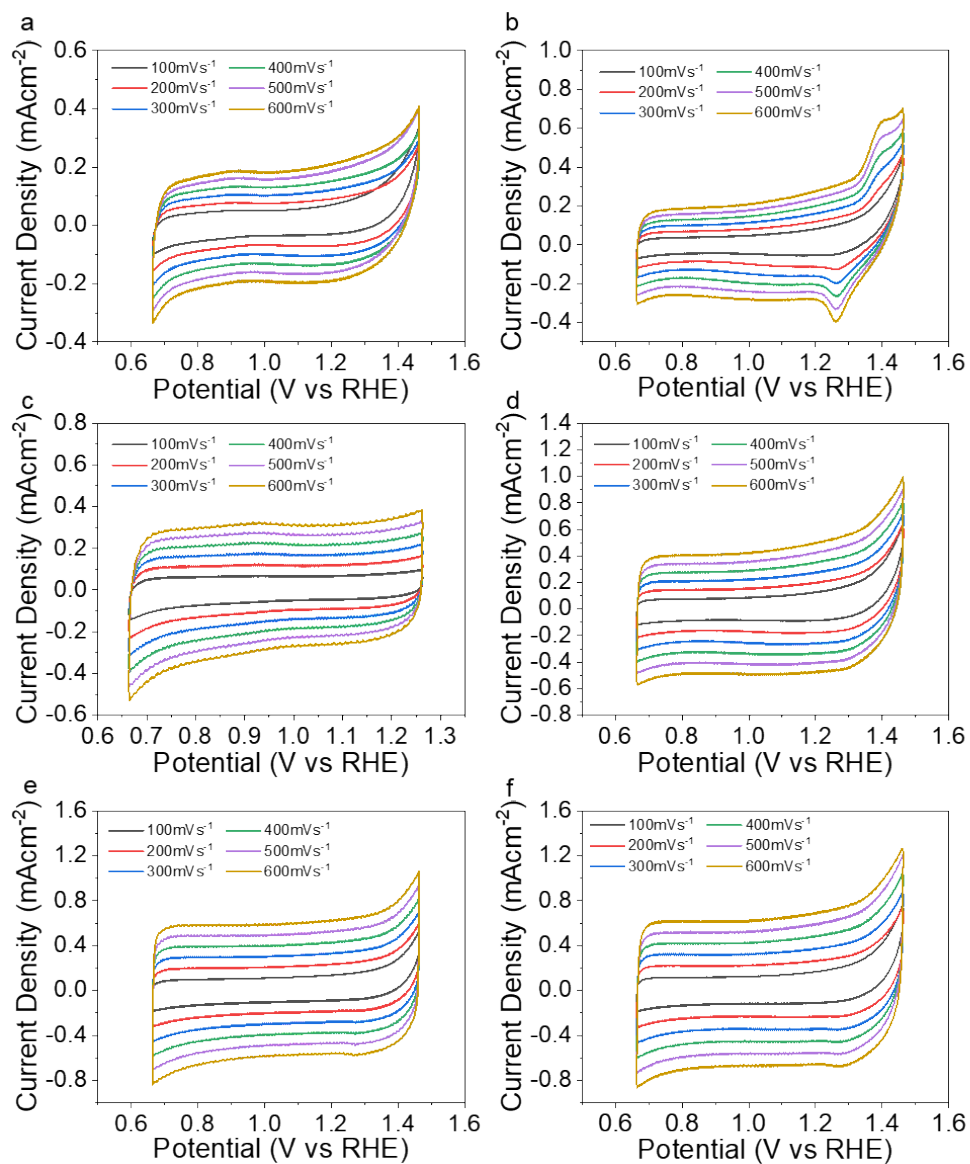

**Fig. S8.** CV curves of a) PANI<sub>1</sub>/CP, b) PANI<sub>2</sub>/CP, c) PANI<sub>3</sub>/CP, d) PANI<sub>4</sub>/CP, e) PANI<sub>5</sub>/CP and f) PANI<sub>6</sub>/CP samples at different scan rate from 100 mV s<sup>-1</sup> to 600 mV s<sup>-1</sup> in 0.1 M KOH solution with 10 mM HMF.

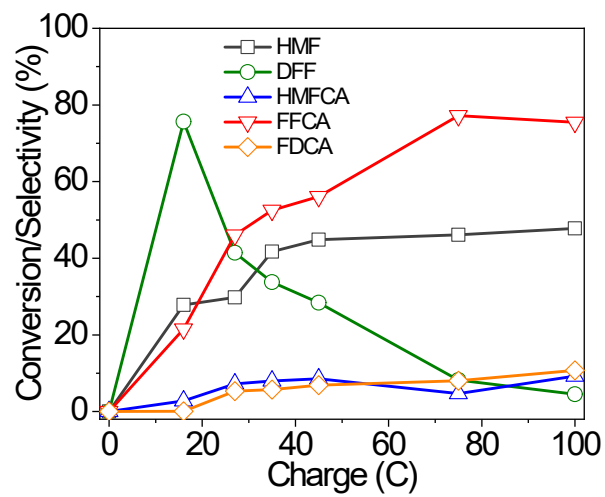

**Fig. S9.** Conversion of HMF and selectivity of its oxidation products with PANI<sub>4</sub>/CP electrode catalyst as function of charge at potential of 1.96 V<sub>RHE</sub>.

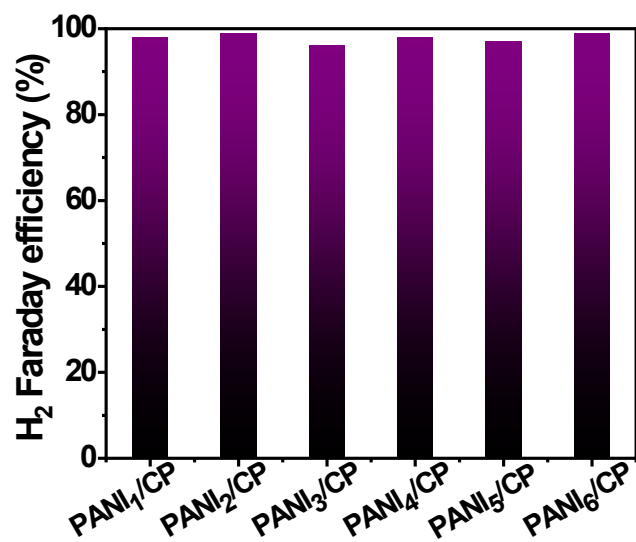

**Fig. S10.** H<sub>2</sub> Faradaic efficiency on Pt cathode for all PANI/CP catalysts.

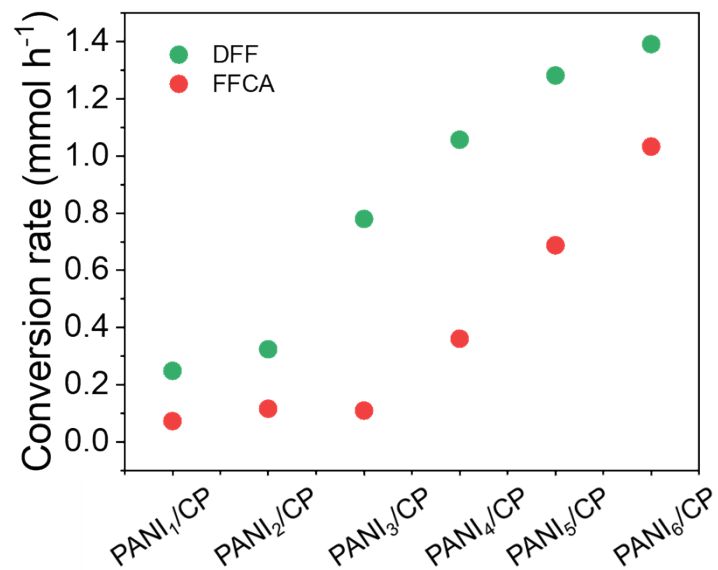

**Fig. S11.** Conversion rates of DFF or FFCA for all PANI/CP samples when DFF or FFCA as the reactant until transferred 28.8 C electrons at potential of 1.96 V<sub>RHE</sub>.

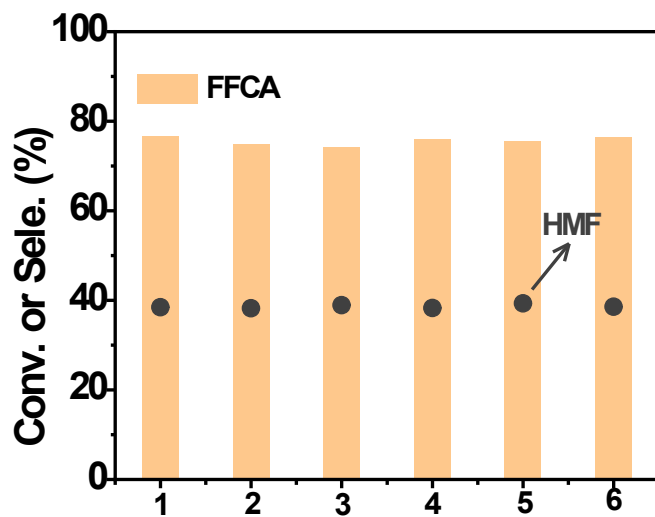

**Fig. S12.** Conversion of HMF, selectivity of FFCA of PANI<sub>4</sub>/CP sample at potential of 1.96 V<sub>RHE</sub> after 6 cycles.

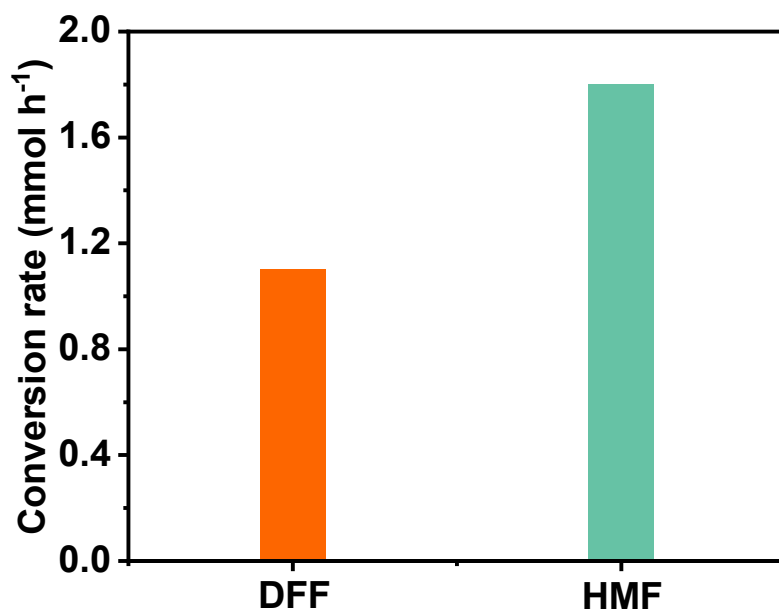

**Fig. S13.** Conversion rates of HMF or DFF for PANI<sub>4</sub>/CP sample when HMF or DFF as the reactant, respectively at potential of 1.96 V<sub>RHE</sub>.

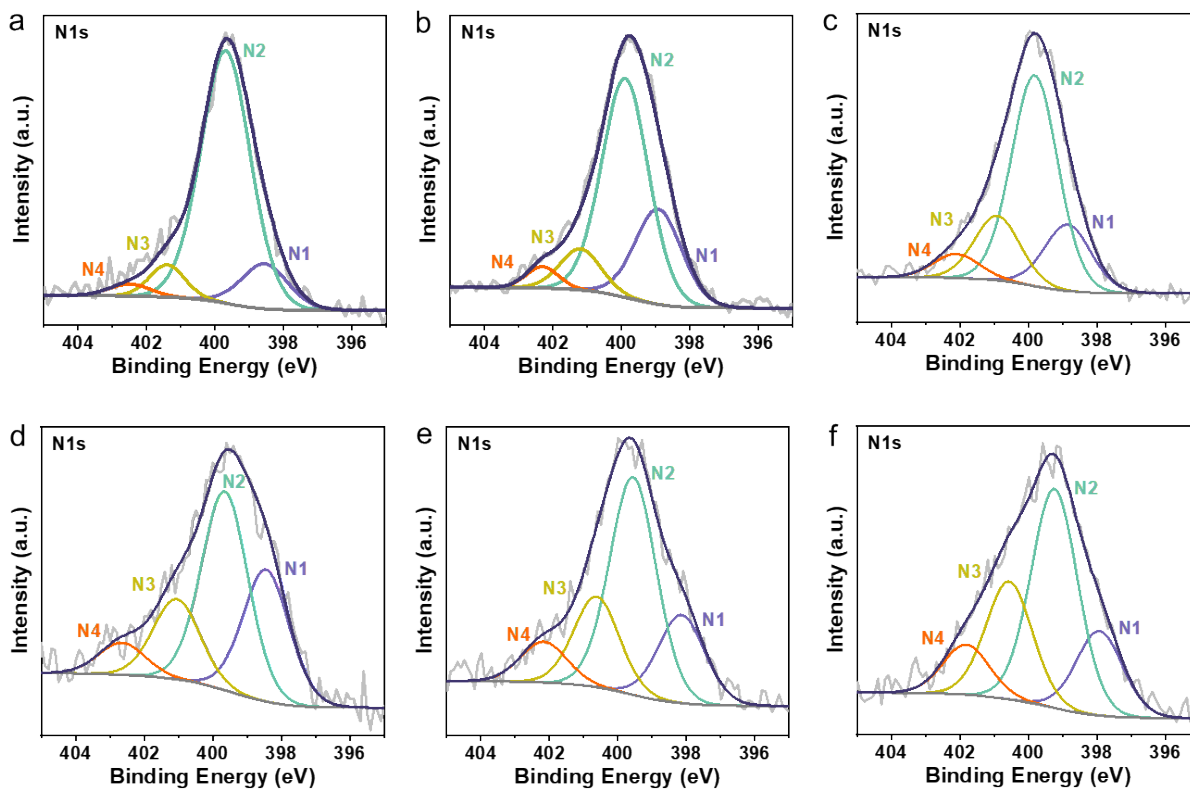

**Fig. S14.** Deconvoluted N1s XPS spectra of a) PANI<sub>1</sub>/CP, b) PANI<sub>2</sub>/CP, c) PANI<sub>3</sub>/CP, d) PANI<sub>4</sub>/CP, d) PANI<sub>5</sub>/CP and e) PANI<sub>6</sub>/CP samples after HMFOR reaction.

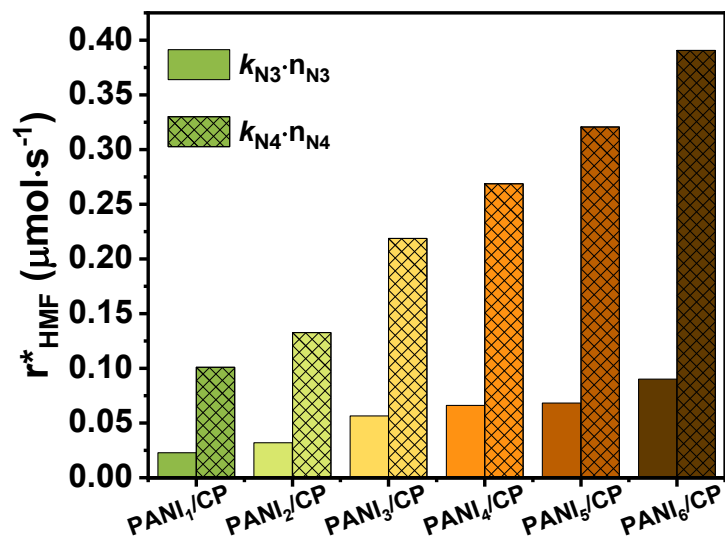

**Fig. S15.** Contribution of N4 and N3 to HMFOR after considering the number of active sites in catalysts, where  $r^*_{\text{HMF}}$  is the theoretical conversion rate of HMF.



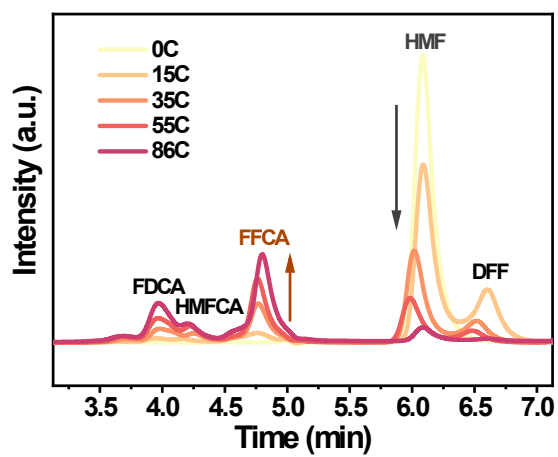

**Fig. S16.** High performance liquid chromatography analysis results for all reactants and products during the HMF electrooxidation reaction for PANI<sub>4</sub>/CP catalyst.

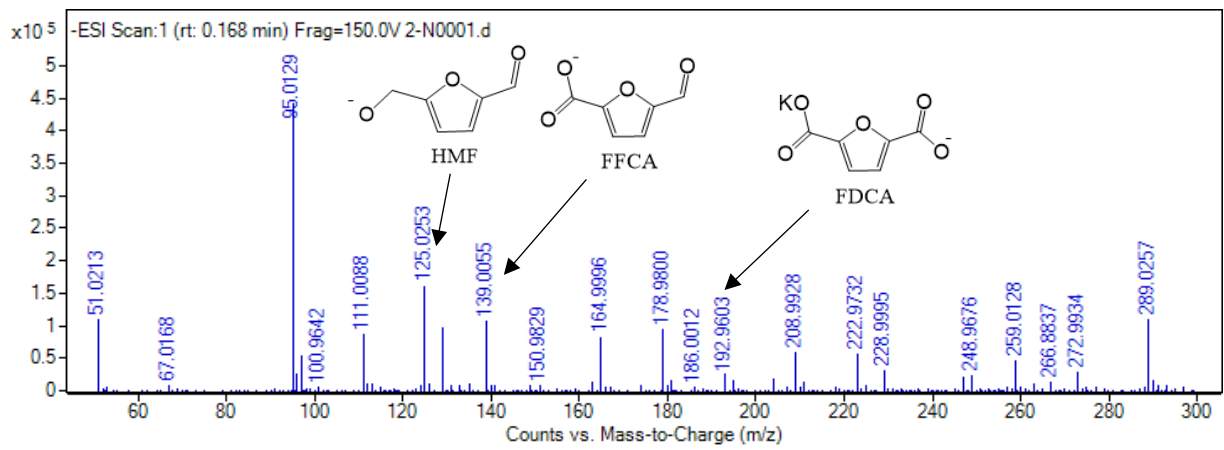

**Fig. S17.** Mass spectrometry spectra of the electrolyte after the reaction with PANI<sub>4</sub>/CP catalyst.

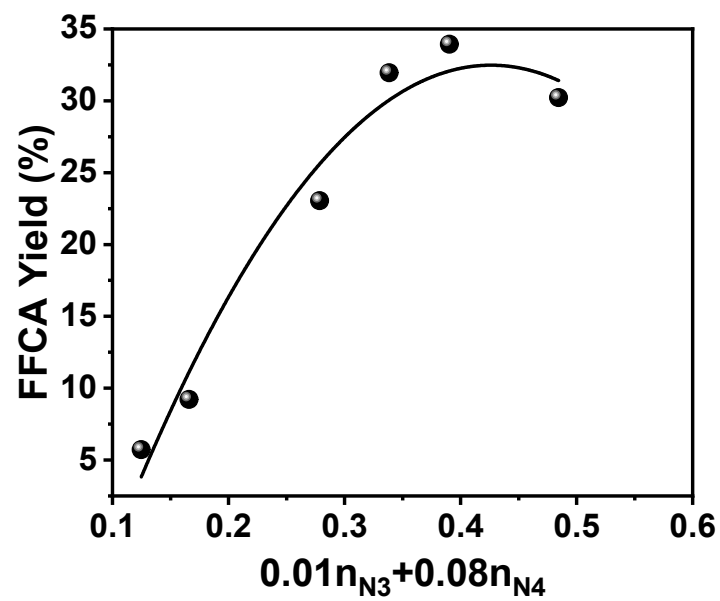

**Fig. S18.** Contribution of all active sites (oxidation capacity) of PANI catalysts as a function of yield of FFCA.

**Table S1.** Assignments of FT-IR peak of all PANI/CP catalysts.

| Peak position (cm <sup>-1</sup> ) | Assignments                                            | Structure                                                                           |
|-----------------------------------|--------------------------------------------------------|-------------------------------------------------------------------------------------|
| 1154                              | N=Q=N absorption peaks (Q represents the quinoid ring) |  |
| 1307                              | C-N stretching mode                                    |  |
| 1495                              | C=C stretching vibration of the benzenoid rings        |  |
| 1585                              | C=C stretching vibration of the quinoid rings          |  |

**Table S2.** Assignments of Raman bands of all PANI/CP catalysts at an excitation of 532 nm.

| peak position<br>( $\text{cm}^{-1}$ ) | Assignments                                    | Structure                                                                           |
|---------------------------------------|------------------------------------------------|-------------------------------------------------------------------------------------|
| 412                                   | Out of plane C-H wag in polaronic structures   | 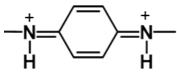 |
| 606                                   | Benzenoid ring in plane deformation            |  |
| 1255                                  | C-N stretching in polaronic units              |  |
| 1376                                  | C-N <sup>+</sup> stretching of radical cations |  |
| 1560                                  | C-C stretching of quinoid rings                |  |

**Table S3.** HMFOR performance of PANI/CP and catalysts.

| Entry | Catalyst         | Electrolyte/HMF concentration | pH | Catalyst loading (mg cm <sup>-2</sup> ) | Potential (V <sub>RHE</sub> ) | HMF Conv. | Product/Sele. |
|-------|------------------|-------------------------------|----|-----------------------------------------|-------------------------------|-----------|---------------|
| 1     | PANI/CP          | 0.1 M KOH/10 mM               | 13 | 1                                       | 1.96                          | 43%       | FFCA/76%      |
| 2     | NiO/CP           | 0.1 M KOH/10 mM               | 13 | 1                                       | 1.36                          | 98%       | FDCA/100%     |
| 3     | CuO/CP           | 0.1 M KOH/10 mM               | 13 | 1                                       | 1.46                          | 96%       | FDCA/100%     |
| 4     | Polypyrrole/CP   | 0.1 M KOH/10 mM               | 13 | 1                                       | 1.96                          | 18%       | DFF/60%       |
| 5     | Polythiophene/CP | 0.1 M KOH/10 mM               | 13 | 1                                       | 1.96                          | 12%       | DFF/54%       |

**Table S4.** HMFOR performance of PANI/CP and other reported catalysts.

| Entry | Catalyst                                 | Electrolyte/HMF concentration | pH  | Catalyst loading (mg cm <sup>-2</sup> ) | Potential (V <sub>RHE</sub> ) | HMF Conv.         | Product/Sele.           | Ref.      |
|-------|------------------------------------------|-------------------------------|-----|-----------------------------------------|-------------------------------|-------------------|-------------------------|-----------|
| 1     | PANI/CP                                  | 0.1 M KOH/10 mM               | 13  | 1                                       | 1.96                          | 43%               | FFCA/76%                | This work |
| 2     | NC                                       | 0.1 M NaOH/5 mM               | 13  | 0.3                                     | 1.90                          | 15%               | FDCA/26% <sup>a</sup>   | 1         |
|       | BNC                                      |                               |     |                                         |                               | 71%               | FDCA/80% <sup>a</sup>   |           |
| 3     | Ru-NiO                                   | 1.0 M PBS/50 mM               | 6.9 | NA                                      | 1.50                          | 55%               | DFF/61% <sup>a</sup>    | 2         |
| 4     | Ni(NS)                                   | 0.1 M KOH/5 mM                | 13  | NA                                      | 1.36                          | 99.7%             | FDCA/99.7%              | 3         |
| 5     | CoO-CoSe <sub>2</sub>                    | 1.0 M KOH/10 mM               | 14  | 5                                       | 1.43                          | 100%              | FDCA/96%                | 4         |
| 6     | CuCo <sub>2</sub> O <sub>4</sub>         | 1.0 M KOH/50 mM               | 14  | 0.2                                     | 1.45                          | 98%               | FDCA/95.6% <sup>a</sup> | 5         |
| 7     | Ir-Co <sub>3</sub> O <sub>4</sub>        | 1.0 M KOH/50 mM               | 12  | NA                                      | 1.42                          | ≥99% <sup>a</sup> | FDCA/98% <sup>a</sup>   | 6         |
| 8     | Ni <sub>3</sub> S <sub>2</sub>           | 1.0 M KOH/10 mM               | 14  | NA                                      | 1.423                         | ≥99% <sup>a</sup> | FDCA/97% <sup>a</sup>   | 7         |
| 9     | MoO <sub>2</sub> -FeP@C                  | 1.0 M KOH/10 mM               | 14  | 1.9                                     | 1.424                         | 99.4%             | FDCA/98%                | 8         |
| 10    | (FeCrCoNiCu) <sub>3</sub> O <sub>4</sub> | 1.0 M KOH/50 mM               | 14  | 0.8                                     | 1.50                          | ≥99% <sup>a</sup> | FDCA/97% <sup>a</sup>   | 9         |
| 11    | N-Co <sub>3</sub> O <sub>4</sub>         | 1.0 M KOH/50 mM               | 14  | NA                                      | 1.423                         | 99.5%             | FDCA/97.8%              | 10        |
| 12    | PdAu/C                                   | 0.1 M KOH/50 mM               | 13  | NA                                      | 0.90                          | ≥99% <sup>a</sup> | FDCA/83% <sup>a</sup>   | 11        |
| 13    | Pt/Ni(OH) <sub>2</sub>                   | 1.0 M KOH/50 mM               | 14  | 0.2                                     | NA                            | ≥99% <sup>a</sup> | FDCA96% <sup>a</sup>    | 12        |

<sup>a</sup> Data that is not listed explicitly in the literature. NA: not available.

**Table S5.** Contents of N1, N2, N3 and N4 groups on the PANI/CP catalysts after HMFOR reaction from N1s.

| Material              | N1 %  | N2 %  | N3 %  | N4 %  | N1 $\mu\text{mol}$ | N2 $\mu\text{mol}$ | N3 $\mu\text{mol}$ | N4 $\mu\text{mol}$ | $r_{\text{HMF}} \mu\text{mol}\cdot\text{s}^{-1}$ |
|-----------------------|-------|-------|-------|-------|--------------------|--------------------|--------------------|--------------------|--------------------------------------------------|
| PANI <sub>1</sub> /CP | 12.89 | 77.16 | 6.95  | 3.01  | 5.18               | 27.84              | 2.80               | 1.21               | 0.08                                             |
| PANI <sub>2</sub> /CP | 26.09 | 59.95 | 9.90  | 4.06  | 9.97               | 21.46              | 3.89               | 1.59               | 0.15                                             |
| PANI <sub>3</sub> /CP | 18.30 | 57.70 | 17.39 | 6.61  | 7.27               | 22.91              | 6.90               | 2.62               | 0.28                                             |
| PANI <sub>4</sub> /CP | 29.77 | 44.83 | 18.17 | 7.24  | 13.23              | 19.92              | 8.08               | 3.22               | 0.30                                             |
| PANI <sub>5</sub> /CP | 20.26 | 49.98 | 20.37 | 9.39  | 8.29               | 20.44              | 8.33               | 3.84               | 0.38                                             |
| PANI <sub>6</sub> /CP | 17.92 | 46.46 | 25.00 | 10.62 | 7.89               | 20.45              | 11.01              | 4.68               | 0.46                                             |



**Note S1.** The contents of N1, N2, N3 and N4 groups on the PANI/CP catalysts are calculated from XPS results. The Equation (1), (2), (3) and (4) are as following:

$$N1 (mmol) = \frac{N\% \times N1\% \times 6 \text{ mg}}{12 \times C\% + 16 \times O\% + 14 \times N\%}$$

(1)

$$N2 (mmol) = \frac{N\% \times N2\% \times 6 \text{ mg}}{12 \times C\% + 16 \times O\% + 14 \times N\%}$$

(2)

$$N3 (mmol) = \frac{N\% \times N3\% \times 6 \text{ mg}}{12 \times C\% + 16 \times O\% + 14 \times N\%}$$

(3)

$$N4 (mmol) = \frac{N\% \times N4\% \times 6 \text{ mg}}{12 \times C\% + 16 \times O\% + 14 \times N\%}$$

(4)

**Note S2.** Identification and quantification of active sites for HMFOR via the conversion rate of HMF transformation (the fitting process).

The experimental observed the conversion rate of HMF transformation ( $r_{HMF}$ ) as dependent variables are linearly fitted with concentration of N3 and N4 functional groups as independent variables using  $k$  as fitting parameters.  $k$  represents the number of HMF reactant converted per mole of active site per second. The derived Equation (5) is as following:

$$r_{HMF} = k_{N3} \cdot n_{N3} + k_{N4} \cdot n_{N4} \quad (5)$$

Where  $r_{HMF}$ ,  $n_{N3}$  and  $n_{N4}$  represent the conversion rate of HMF transformation and concentration of N3 and N4 on catalysts, respectively.

## Reference<sup>1-15</sup>

1. Qin, Q. et al. Electrochemical fixation of nitrogen and its coupling with biomass valorization with a strongly adsorbing and defect optimized boron–carbon–nitrogen catalyst. *ACS Appl. Energy Mater.*, **2**, 8359-8365, (2019).
2. Ge, R. et al. Selective electrooxidation of biomass-derived alcohols to aldehydes in a neutral medium: Promoted water dissociation over a nickel-oxide-supported ruthenium single-atom catalyst. *Angew. Chem. Int. Ed.*, **61**, e202200211, (2022).
3. Lu, X. et al. Highly efficient electro-reforming of 5-hydroxymethylfurfural on vertically oriented nickel nanosheet/carbon hybrid catalysts: Structure-function relationships. *Angew. Chem. Int. Ed.*, **60**, 14528-14535, (2021).
4. Huang, X. et al. Enhancing the electrocatalytic activity of CoO for the oxidation of 5-hydroxymethylfurfural by introducing oxygen vacancies. *Green Chem.*, **22**, 843-849, (2020).
5. Lu, Y. et al. Identifying the Geometric Site Dependence of Spinel Oxides for the Electrooxidation of 5-Hydroxymethylfurfural. *Angew. Chem. Int. Ed.*, **59**, 19215-19221, (2020).
6. Lu, Y. X. et al. Tuning the Selective Adsorption Site of Biomass on Co<sub>3</sub>O<sub>4</sub> by Ir Single Atoms for Electrosynthesis. *Adv. Mater.*, **33**, 6, (2021).
7. You, B. Liu, X. Jiang, N. & Sun, Y. A General Strategy for Decoupled Hydrogen Production from Water Splitting by Integrating Oxidative Biomass Valorization. *J. Am. Chem. Soc.*, **138**, 13639-13646, (2016).
8. Yang, G. et al. Interfacial Engineering of MoO<sub>2</sub>-FeP Heterojunction for Highly Efficient Hydrogen Evolution Coupled with Biomass Electrooxidation. *Adv. Mater.*, **32**, e2000455, (2020).
9. Gu, K. et al. Defect-Rich High-Entropy Oxide Nanosheets for Efficient 5-Hydroxymethylfurfural Electrooxidation. *Angew. Chem. Int. Ed.*, **60**, 20253-20258, (2021).
10. Sun, M. et al. Nitrogen-doped Co<sub>3</sub>O<sub>4</sub> nanowires enable high-efficiency electrochemical oxidation of 5-hydroxymethylfurfural. *Chinese Chemical Letters*, **33**, 385-389, (2022).
11. Chadderdon, D. J. et al. Electrocatalytic oxidation of 5-hydroxymethylfurfural to 2,5-furandicarboxylic acid on supported Au and Pd bimetallic nanoparticles. *Green Chem.*, **16**, 3778-3786, (2014).
12. Zhou, B. et al. Platinum modulates redox properties and 5-hydroxymethylfurfural adsorption kinetics of Ni(OH)<sub>2</sub> for biomass upgrading. *Angew. Chem. Int. Ed.*, **60**, 22908-22914, (2021).
